# Supplementary material for: The Split Flow Process of CO2 Capture with Aqueous Ammonia Using the eNRTL Model
Source: MDPI journal article supplement (doi:10.3390/pr10091839), 2022-09-13
Supplement: s1 [file s1]

**Table S1.** Comparison of the reflux ratio and CO<sub>2</sub> capture.

| Reflux ratio | CO <sub>2</sub> capture (kg/s) | CO <sub>2</sub> capture (%) |
|--------------|--------------------------------|-----------------------------|
| 1.00         | 100.85                         | 90.02                       |
| 2.00         | 99.81                          | 89.09                       |
| 3.00         | 98.78                          | 88.17                       |
| 3.95         | 97.80                          | 87.3                        |
| 5.00         | 96.72                          | 86.34                       |
| 6.00         | 95.70                          | 85.43                       |

**Table S2.** Comparison of the reboiler duty and CO<sub>2</sub> capture.

| Reboiler duty (MW) | CO <sub>2</sub> capture (kg/s) | CO <sub>2</sub> capture (%) |
|--------------------|--------------------------------|-----------------------------|
| 110.0              | 98.57                          | 87.99                       |
| 120.5              | 99.71                          | 89.00                       |
| 131.0              | 100.85                         | 90.02                       |
| 141.0              | 101.94                         | 90.99                       |
| 151.0              | 103.04                         | 91.97                       |
| 161.5              | 104.2                          | 93.01                       |
| 171.5              | 105.32                         | 94.01                       |
| 181.5              | 106.43                         | 95.00                       |

**Table S3.** Comparison of Semi-lean feed stage.

| Semi-lean feed stage | CO <sub>2</sub> removal rate (%) |
|----------------------|----------------------------------|
| 1                    | 90.009                           |
| 2                    | 90.021                           |
| 3                    | 90.023                           |
| 4                    | 90.021                           |
| 5                    | 90.012                           |
| 6                    | 89.933                           |

**Table S4.** Operating condition for 90% removal rate.

| <b>Ammonia solution<br/>(kg/sec)</b> | <b>Reflux ratio</b> | <b>Reboiler duty<br/>(MW)</b> | <b>NH<sub>3</sub> mass<br/>fraction (%)</b> | <b>NH<sub>3</sub> solution<br/>temperature (°C)</b> |
|--------------------------------------|---------------------|-------------------------------|---------------------------------------------|-----------------------------------------------------|
| 375                                  | 1.0                 | 131                           | 7                                           | 25                                                  |

**Table S5.** Material balance table

| Stream Name    | Units  | CO2      | FEED   | LEANIN   | LEANOUT  | NH3      | PURECO2 | RECYCLE  | RICHIN   | RICHOUT  | LEANIN2  | SPLIT    | VENT    |
|----------------|--------|----------|--------|----------|----------|----------|---------|----------|----------|----------|----------|----------|---------|
| Temperature    | C      | 85.6613  | 50     | 25       | 87.4927  | 25       | 30      | 30       | 80       | 45.3489  | 25       | 85.6874  | 26.1994 |
| Pressure       | bar    | 1.0133   | 1.0133 | 1.0133   | 1.0133   | 1.0133   | 1.0133  | 1.0133   | 1.0133   | 1.0133   | 1.0133   | 1.0133   | 1.0133  |
| Mole Flows     | kmol/s | 167.82   | 20.48  | 160.99   | 161      | 20.9     | 2.38    | 130.94   | 167.2    | 166.09   | 5        | 5        | 16.52   |
| Mole Fractions |        |          |        |          |          |          |         |          |          |          |          |          |         |
| H2O            |        | 0.5611   | 0.1184 | 0.9575   | 0.9548   | 0.9262   | 0.0365  | 0.4648   | 0.9424   | 0.9437   | 0.9534   | 0.95     | 0.0325  |
| CO2            |        | 0.2193   | 0.1243 | 3.46E-07 | 3.68E-05 | 0        | 0.9613  | 9.51E-05 | 0.0067   | 4.29E-05 | 6.52E-07 | 5.48E-05 | 0.0004  |
| N2             |        | 6.34E-06 | 0.7573 | 0        | 2.39E-26 | 0        | 0.0004  | 2.64E-09 | 6.36E-06 | 6.40E-06 | 0        | 1E-30    | 0.939   |
| NH3            |        | 0.2196   | 0      | 0.0212   | 0.025    | 0.0737   | 0.0018  | 0.0005   | 0.0164   | 0.0069   | 0.019    | 0.0237   | 0.0281  |
| H3O+           |        | 0        | 0      | 4.04E-12 | 1.13E-10 | 8.52E-15 | 0       | 5.76E-10 | 2.69E-10 | 1.38E-10 | 5.99E-12 | 1.47E-10 | 0       |
| NH4+           |        | 0        | 0      | 0.0114   | 0.0102   | 8.82E-05 | 0       | 0.2712   | 0.0175   | 0.0255   | 1.47E-02 | 0.0133   | 0       |
| NH2COO-        |        | 0        | 0      | 0.0064   | 0.0038   | 0        | 0       | 0.0098   | 0.0049   | 0.0066   | 0.0081   | 0.0048   | 0       |
| HCO3-          |        | 0        | 0      | 0.0021   | 0.0059   | 0        | 0       | 0.246    | 0.0116   | 0.0155   | 0.0031   | 0.0078   | 0       |
| OH-            |        | 0        | 0      | 1.36E-06 | 1.83E-06 | 8.82E-05 | 0       | 6.40E-08 | 8.91E-07 | 3.73E-07 | 1.03E-06 | 1.50E-06 | 0       |
| CO3--          |        | 0        | 0      | 0.0014   | 0.0003   | 0        | 0       | 0.0076   | 0.0005   | 0.0017   | 0.0017   | 0.0004   | 0       |
